# Supplementary material for: The Risk of Esophageal Food Impaction In Eosinophilic Esophagitis Patients; The Role of Clinical And Socioeconomic Factors
Source: Research Square preprint supplement (doi:10.21203/rs.3.rs-1135957/v1), 2022-01-03
Supplement: Supplementary file 1 [file 0cb97c79a0b3dcb540ee64d0.docx]

Supplementary figure 1 legend: The risk of food impaction in high income versus low income neighborhoods was similar.
